# Supplementary material for: Unique Aggregations of a Large Undescribed Solitary Tunicate in the Arabian Sea
Source: MDPI journal article supplement (doi:10.3390/d16040221), 2024-04-06
Supplement: s1 [file s1]

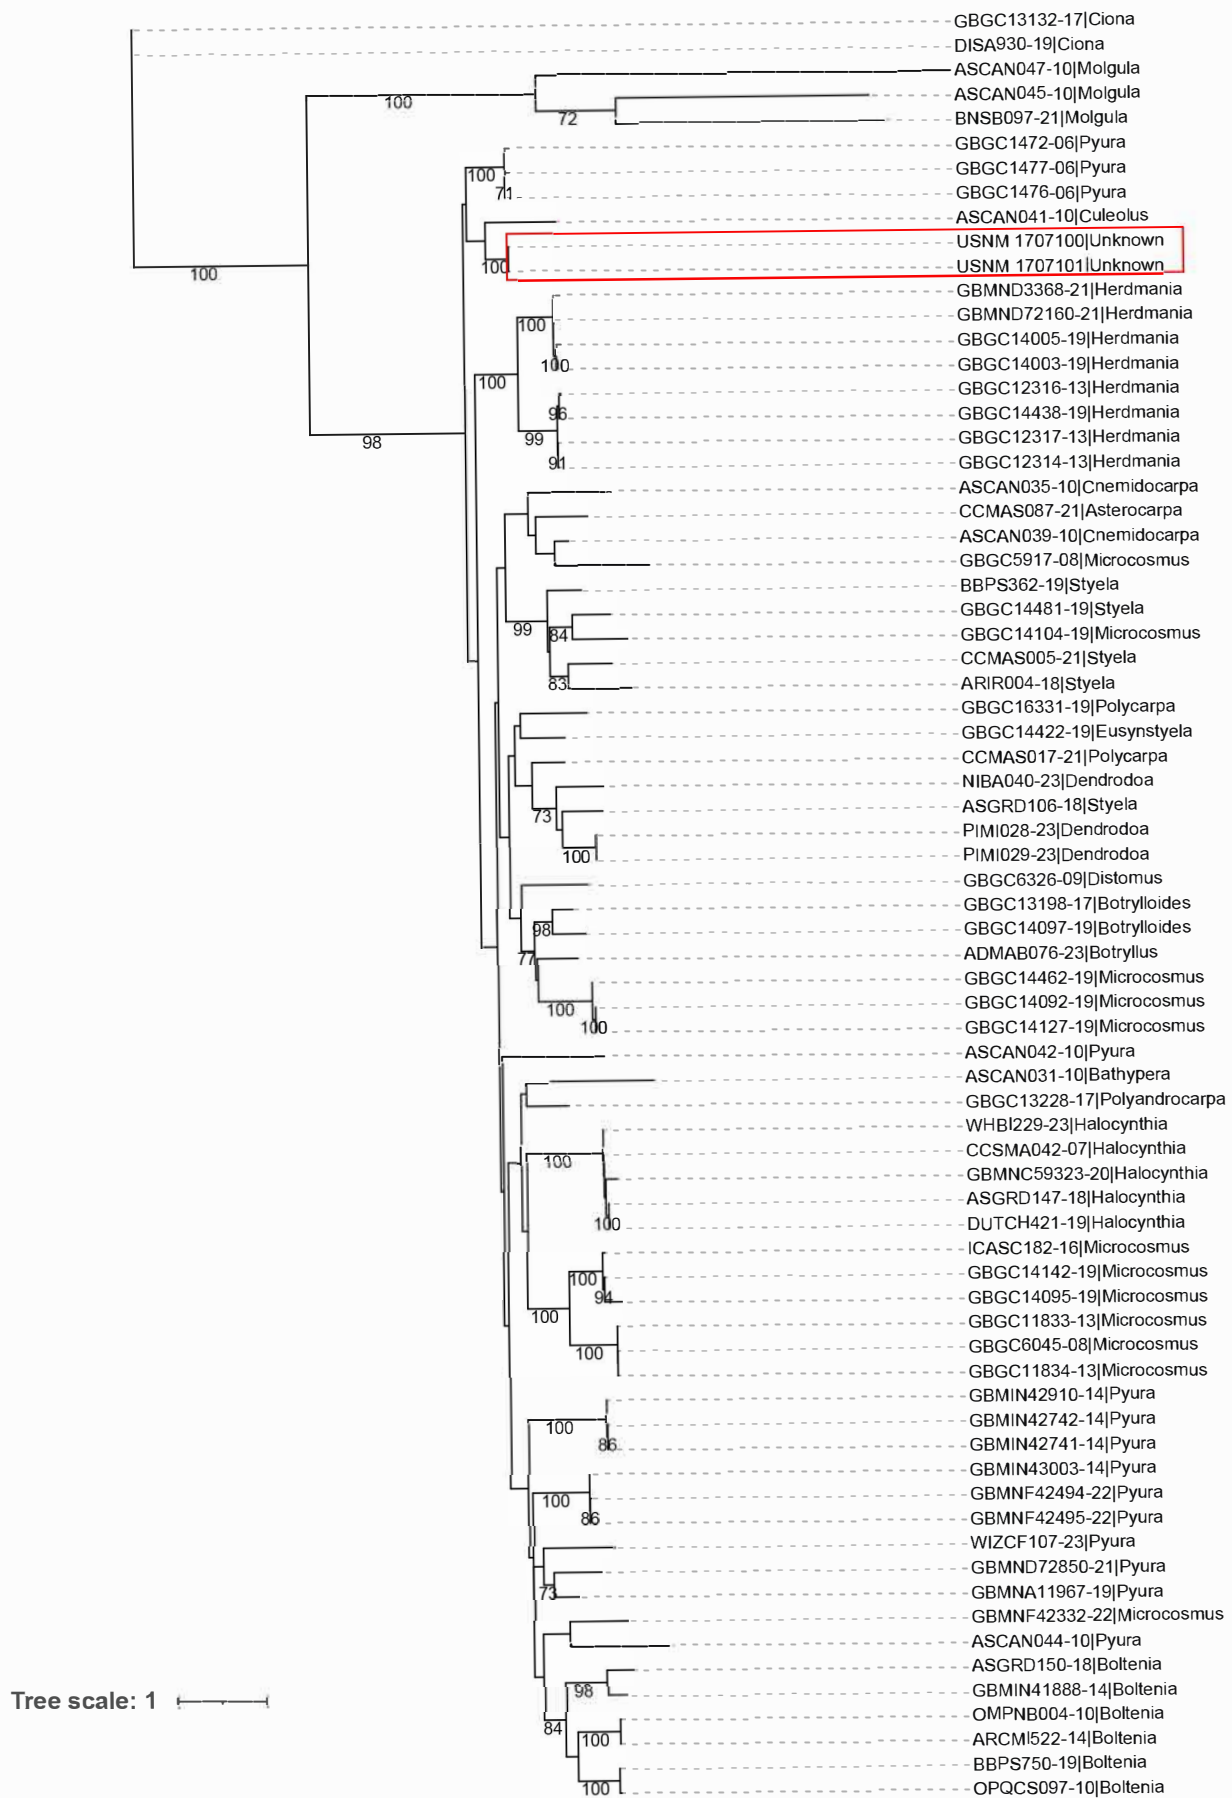

**Figure S1** : Phylogenetic tree of the undescribed pyrid tunicate species, edited on iTOL [26], based on sequences of Cytochrome Oxydase subunit I. All other sequences were obtained from Genbank, and accession codes are indicated in the terminals, along with the genera for each used sequence. Sequences were trimmed on UGENE and aligned with the use of MAFFT and a Maximum Likelihood reconstruction using RaxML with 1000 bootstrap replicates on CIPRES [27], using GTR + G model. DNA amplified for Folmer region of COI with John Geller primers [28].
